# Supplementary material
Source: Springer Nature journal article supplement (https://www.springermedizin.de/resource/supplementary/12992_2010_92_MOESM1_ESM.pdf/9616442)

A.

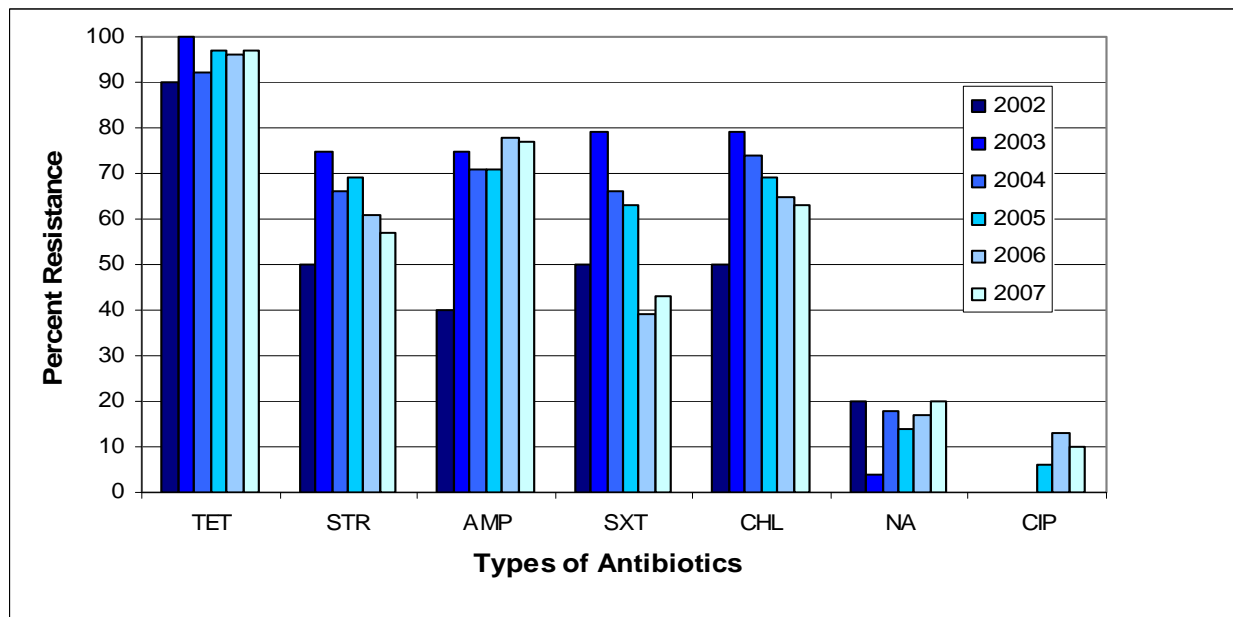

B.

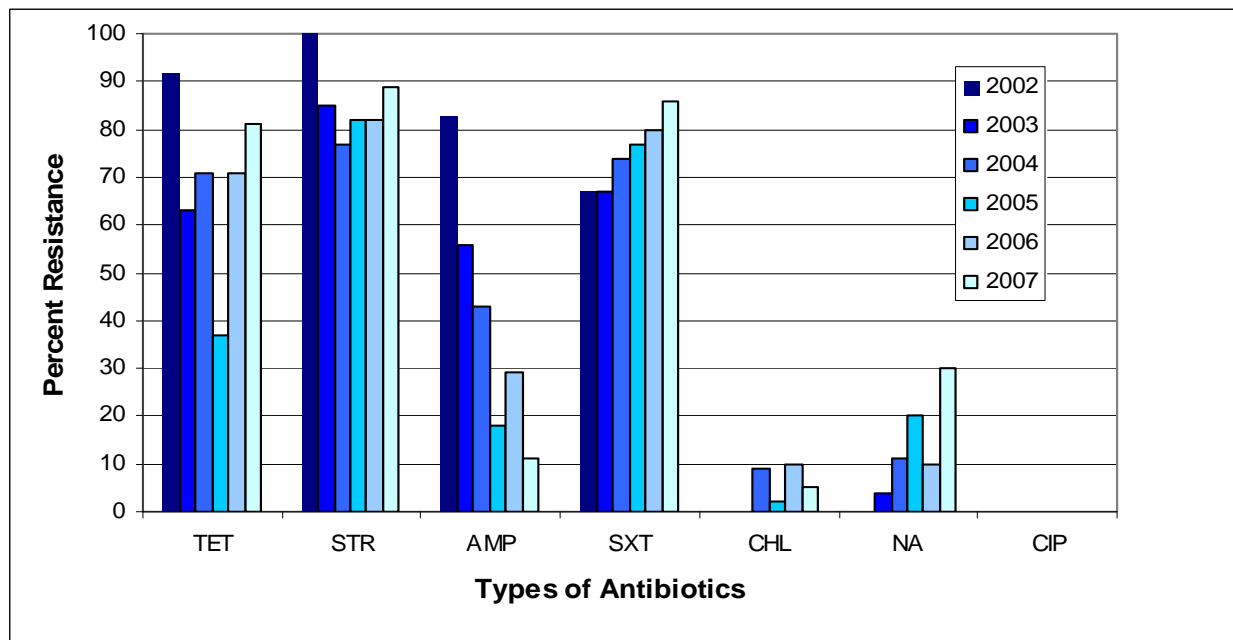

Supplement: MOESM1 [file 9616442]
